# Supplementary material
Source: PubMed Central journal article supplement (PMC8978258)
Supplement: NIHMS1786248-supplement-Figures_S1_-_S11__Table_S1__Data_S1.pdf [file NIHMS1786248-supplement-Figures_S1_-_S11__Table_S1__Data_S1.pdf]

A.

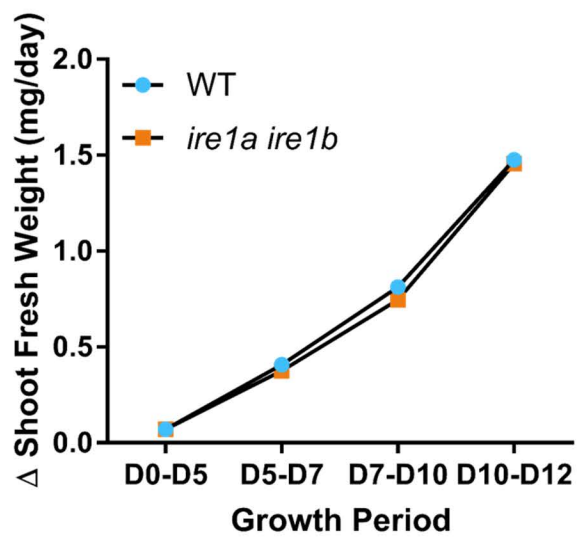

B.

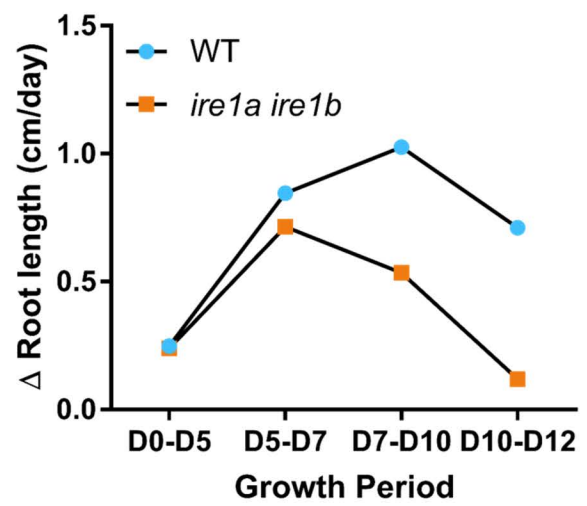

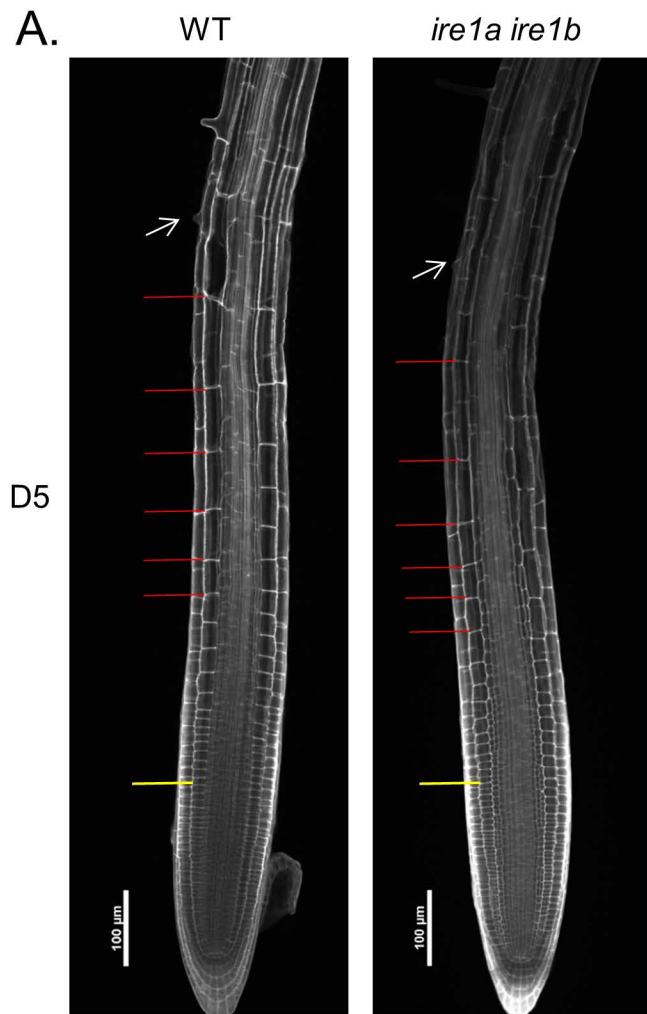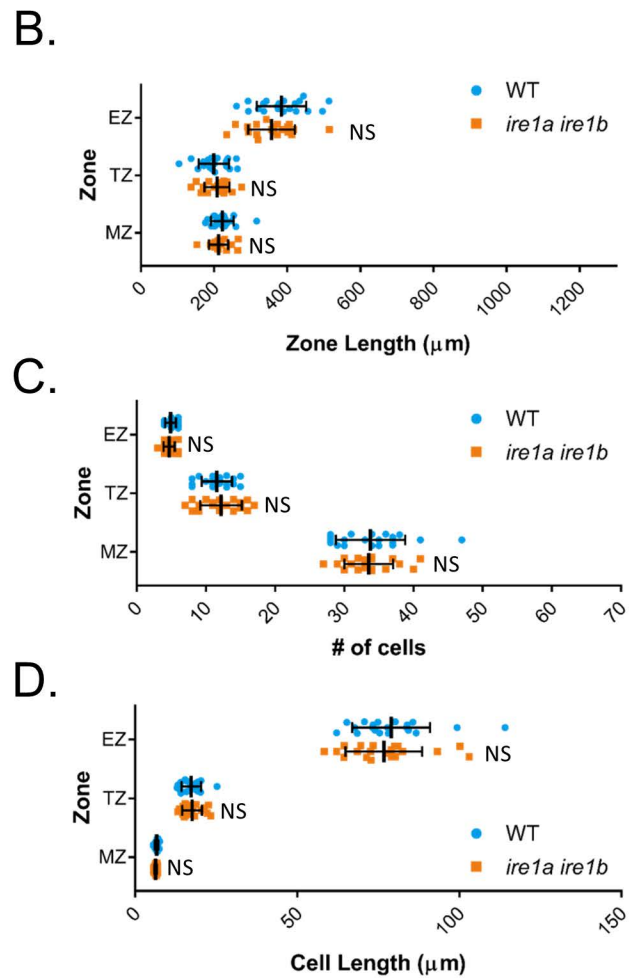

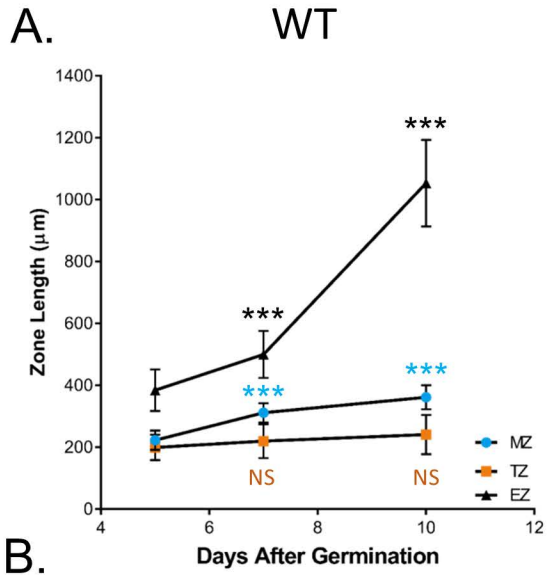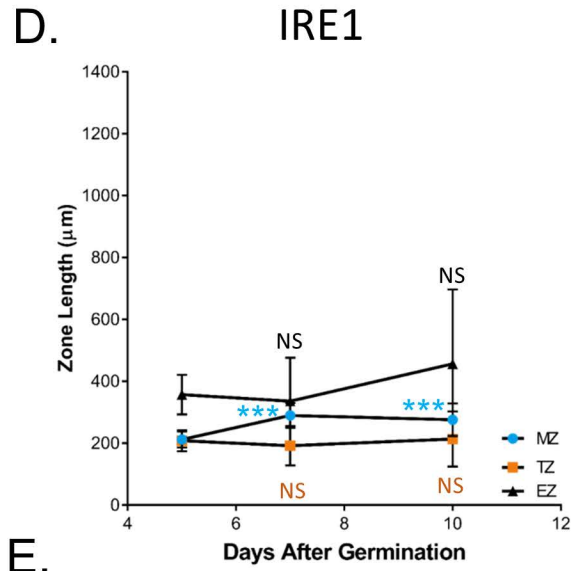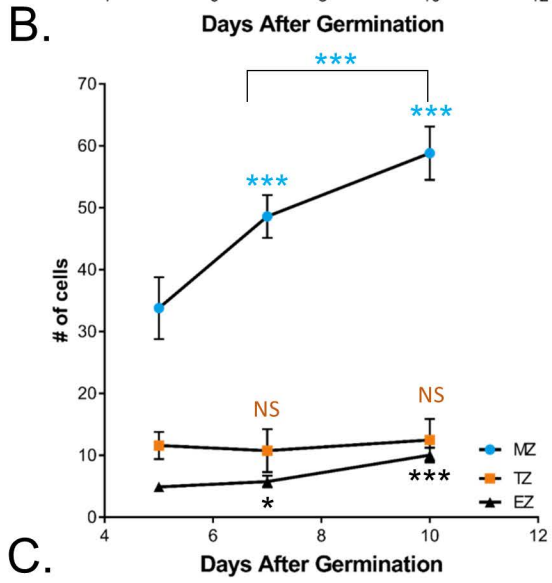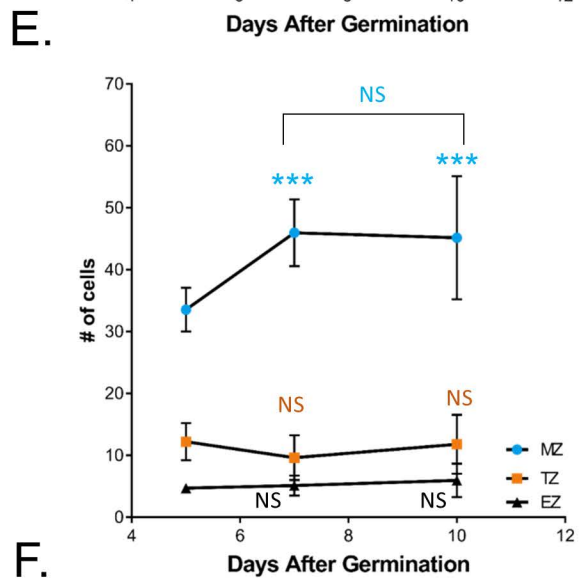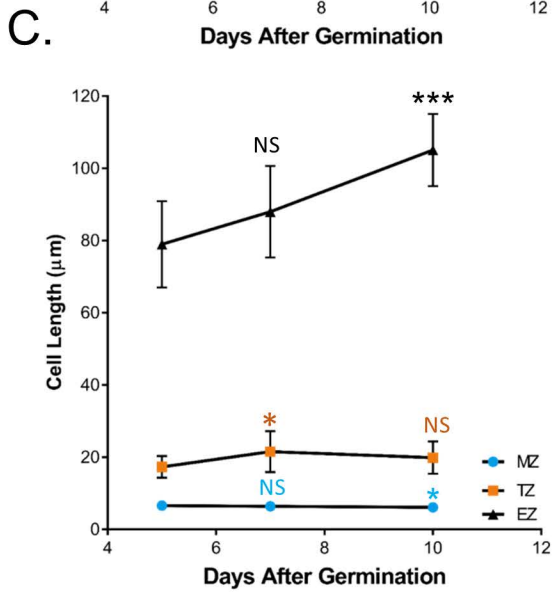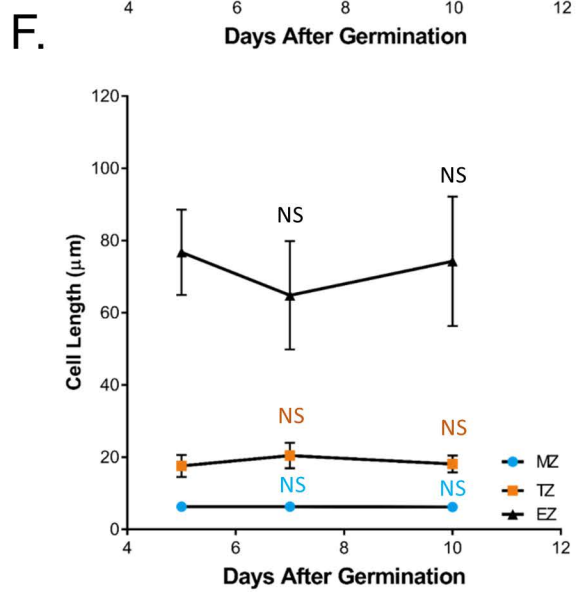

A.

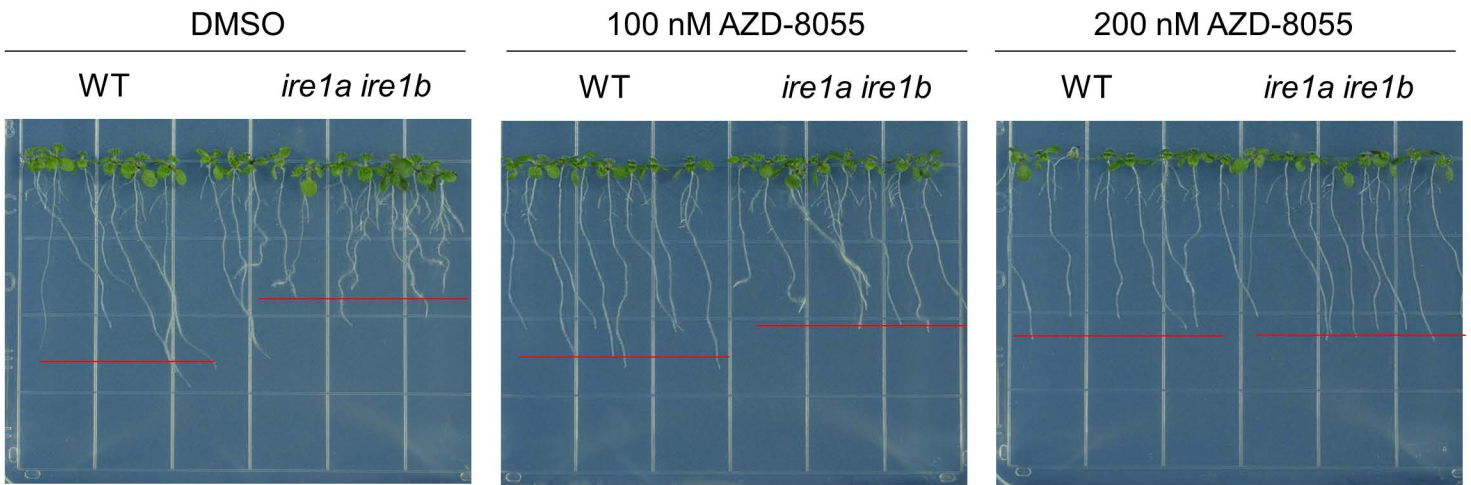

B.

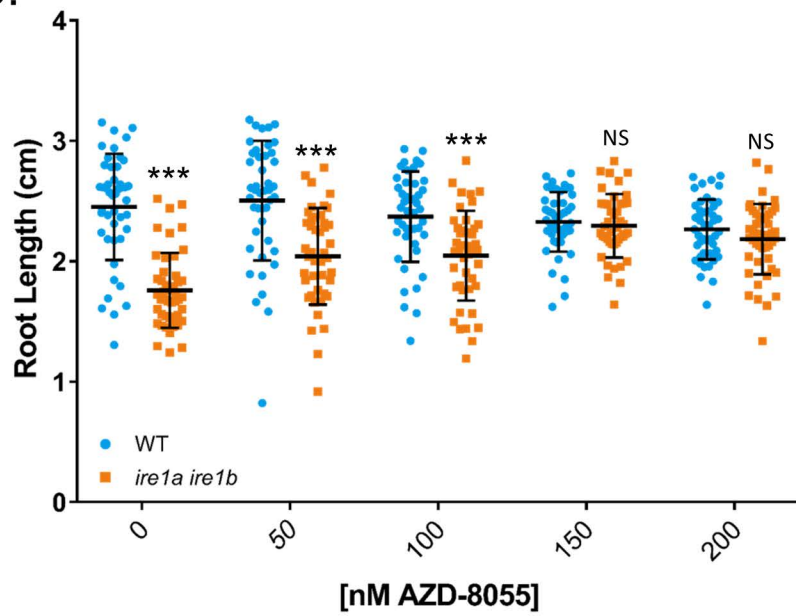

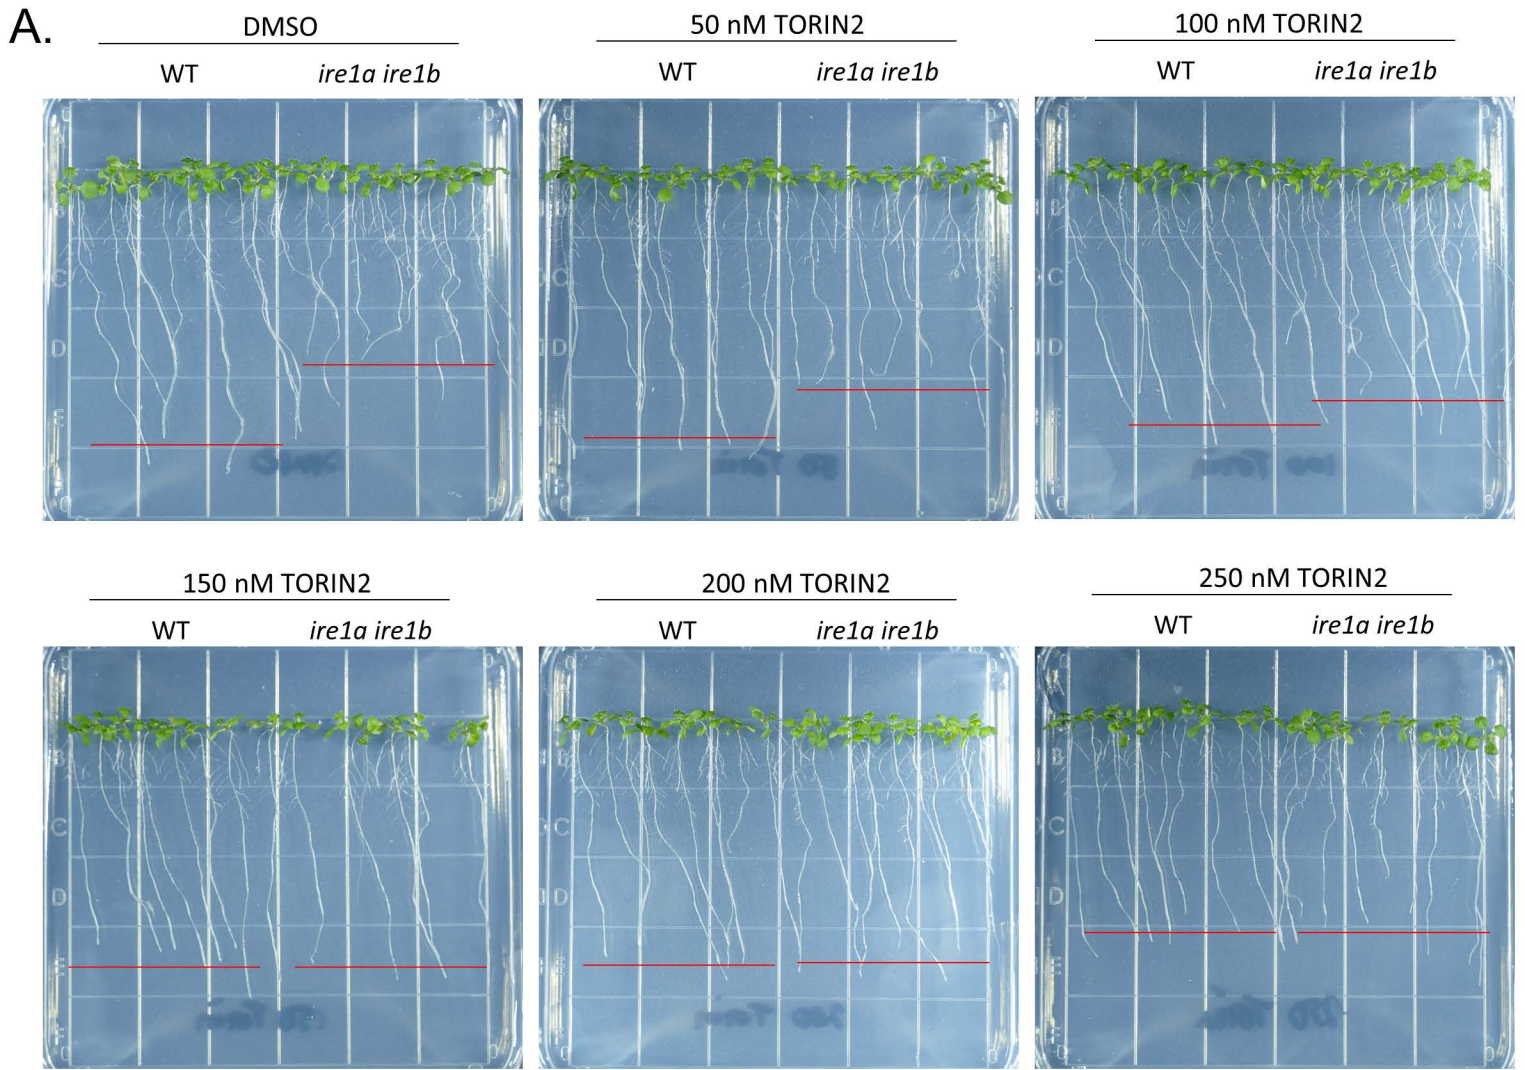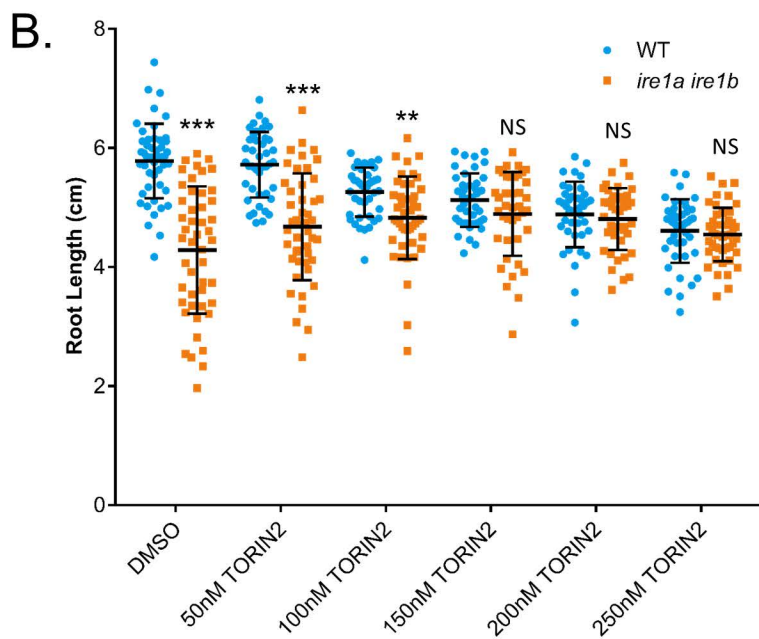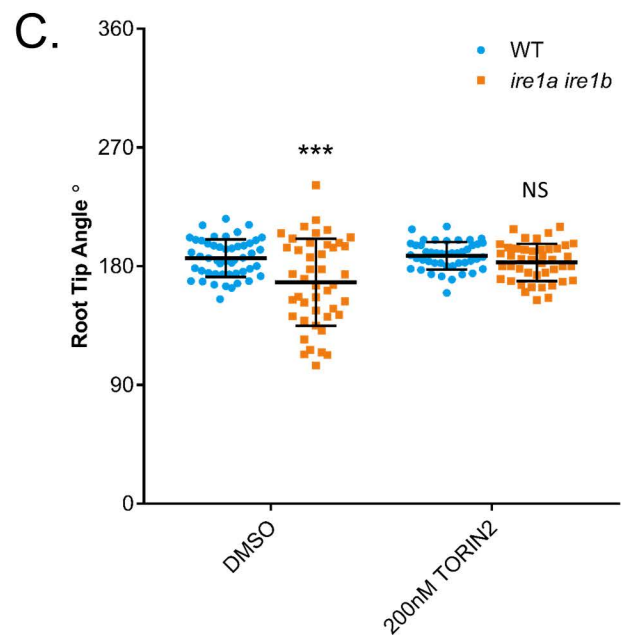



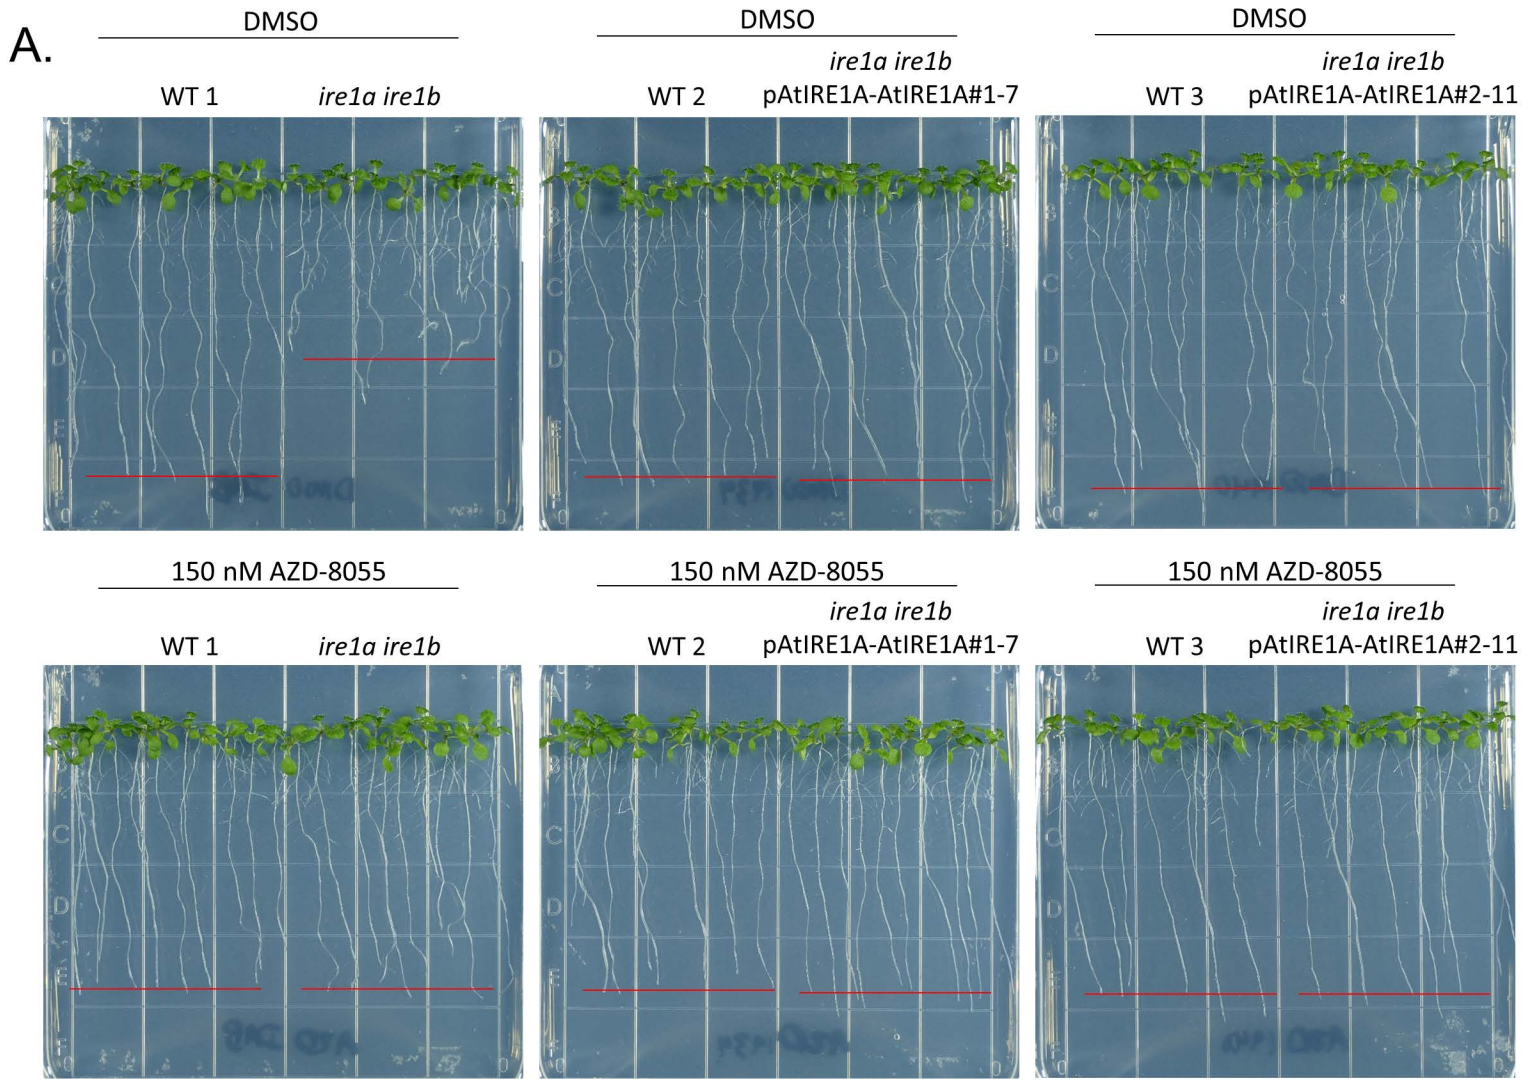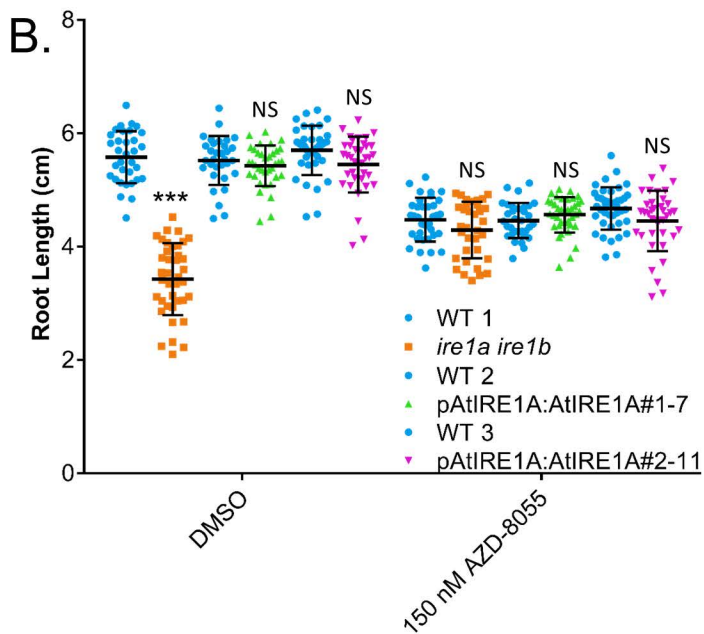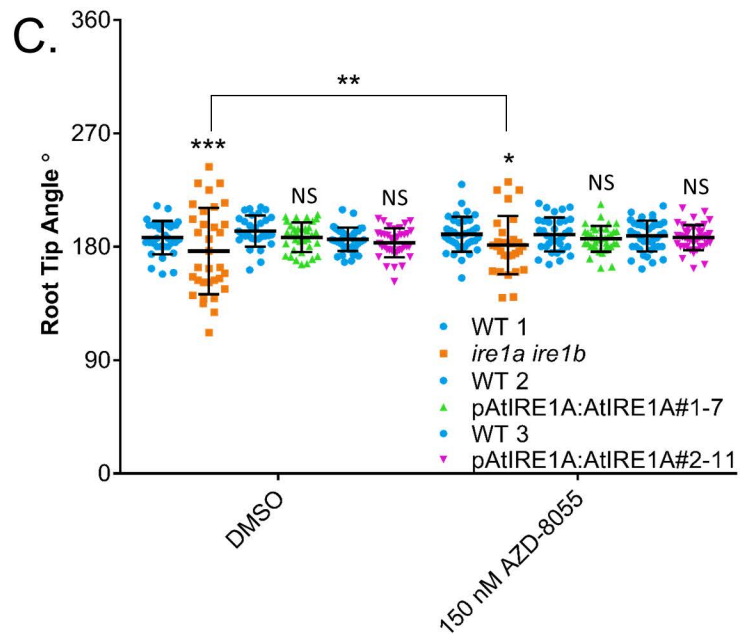

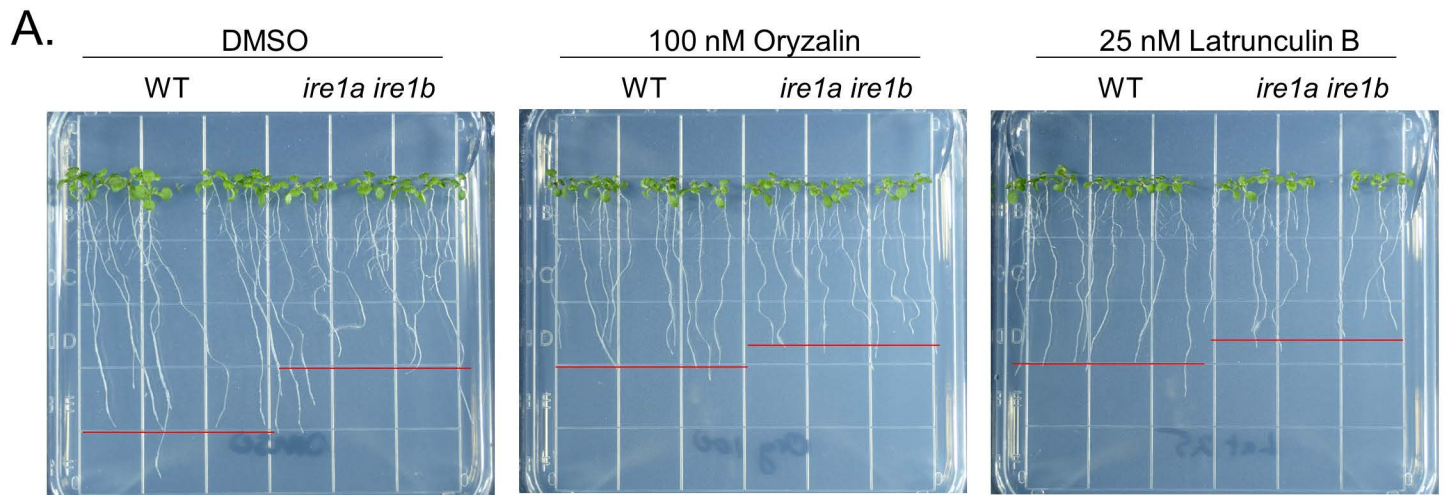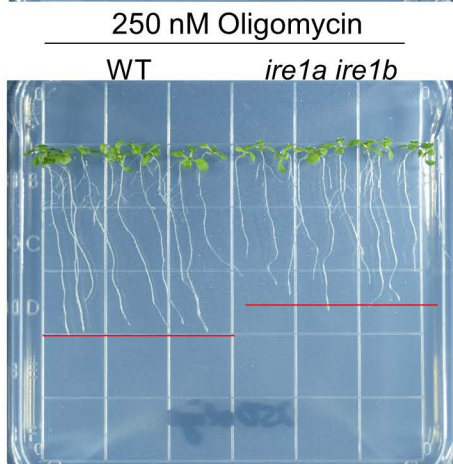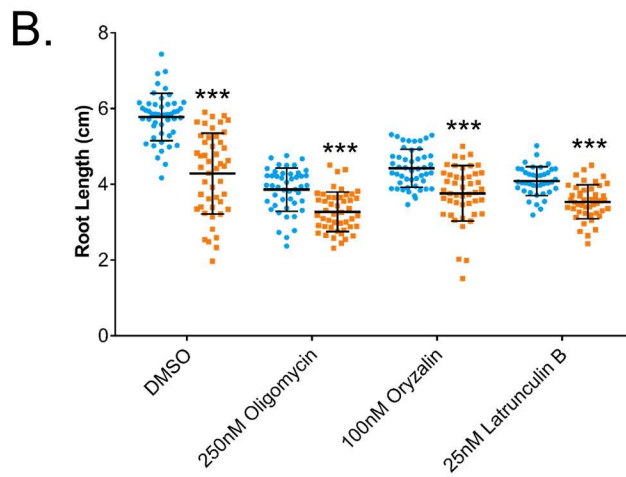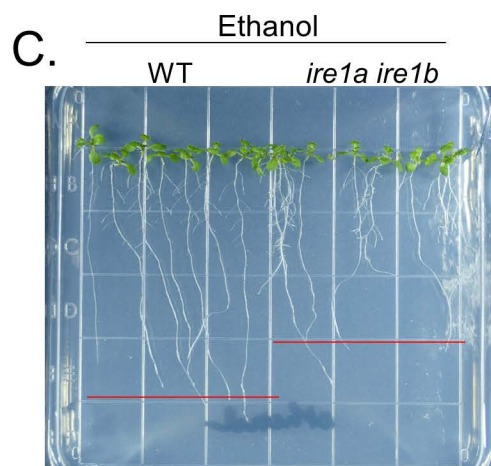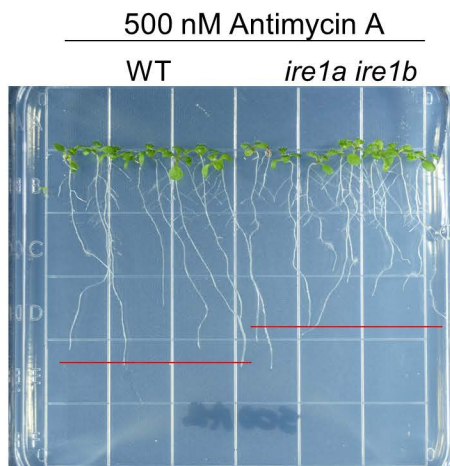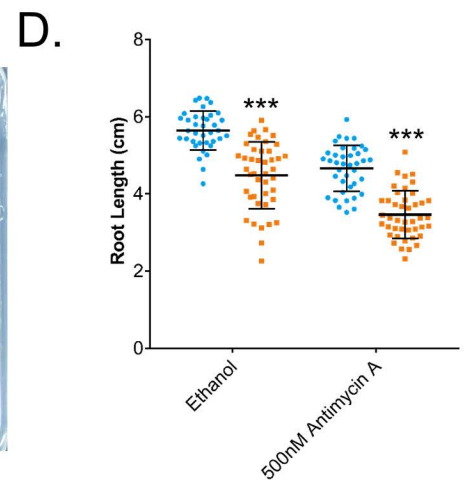



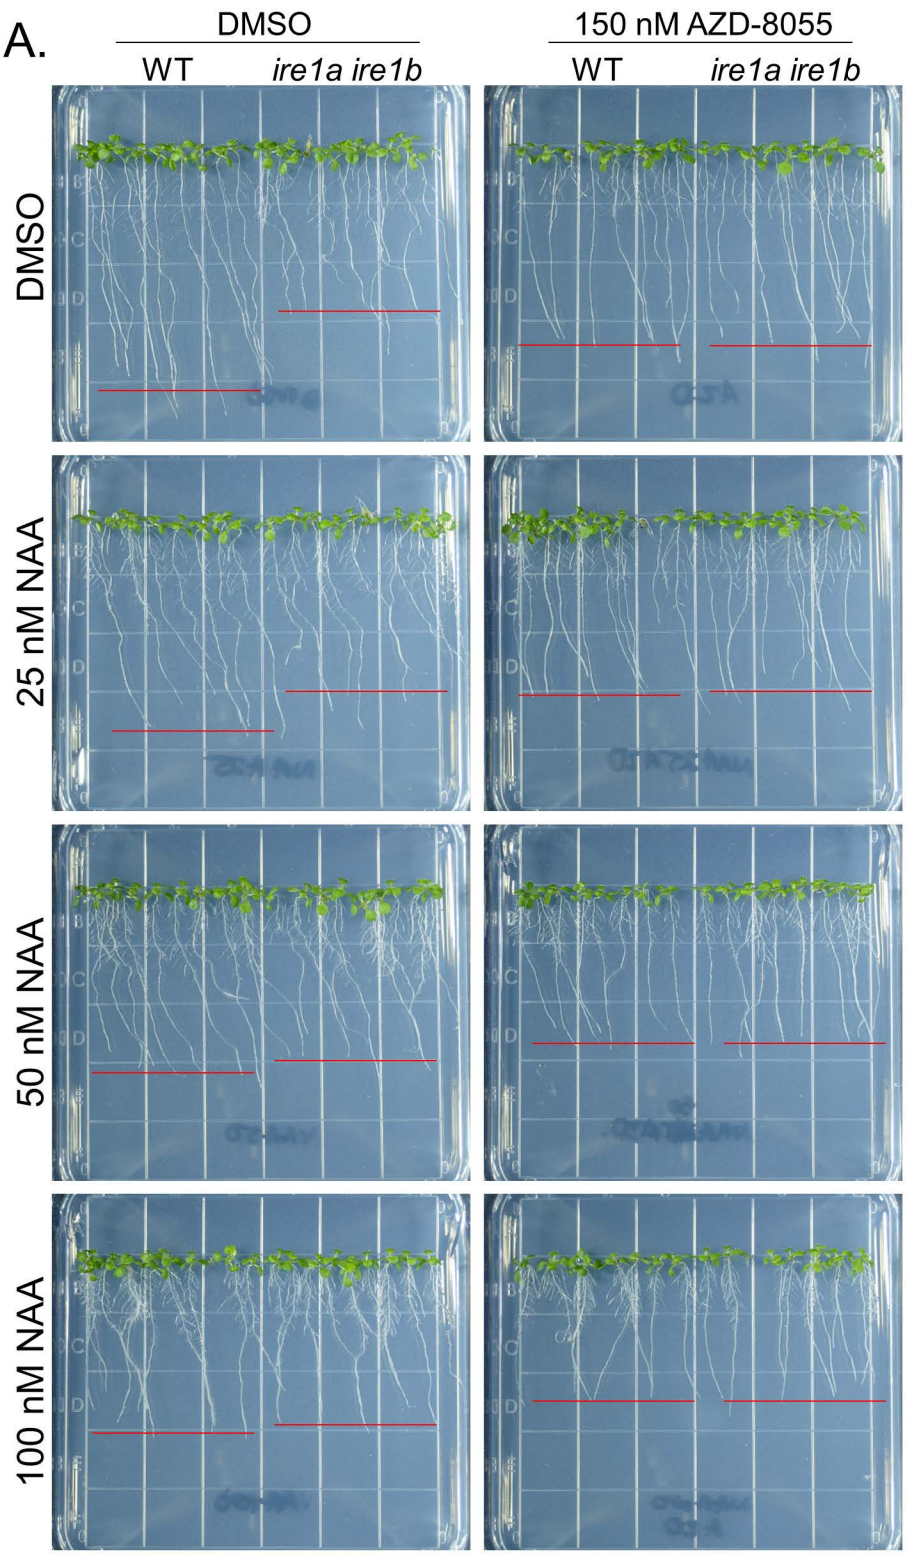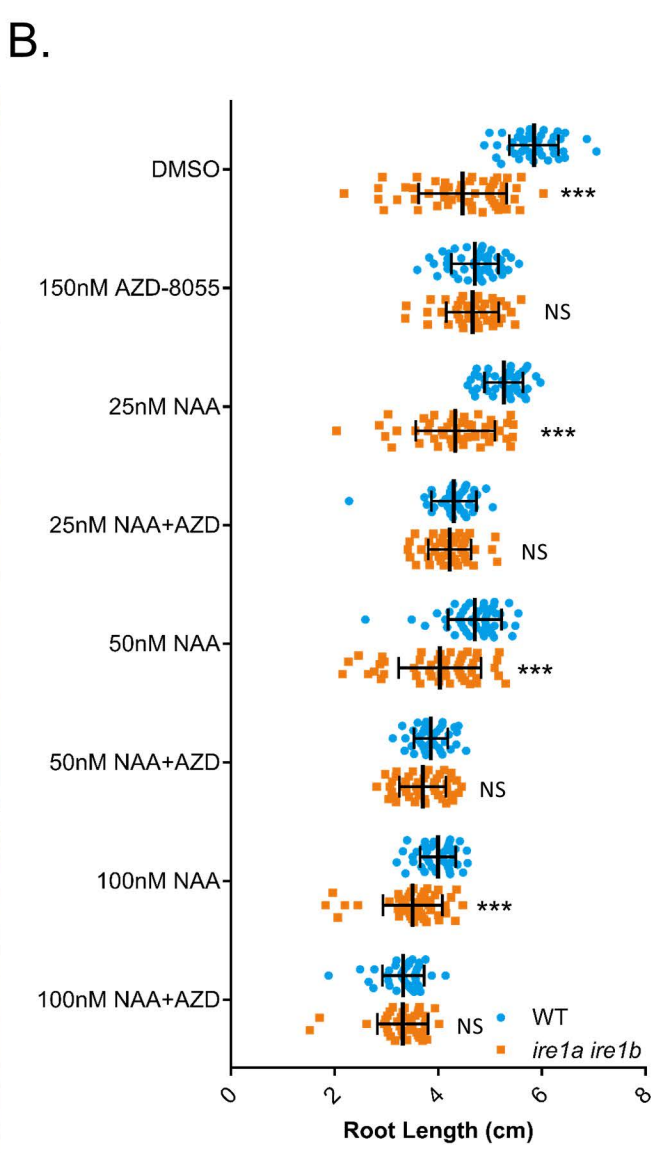



Ponceau stain

Antibody-ECL femto

Root tip  
 $\alpha$ S6K1/2

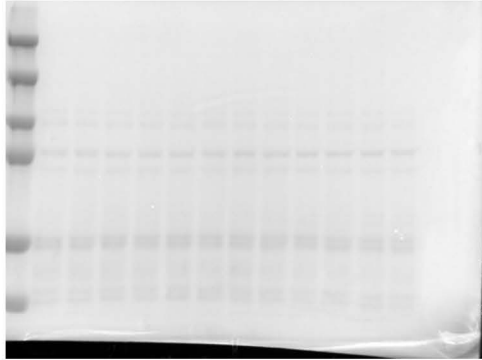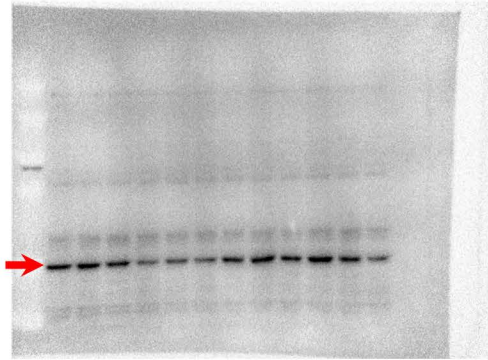

Root tip  
Phos-S6K

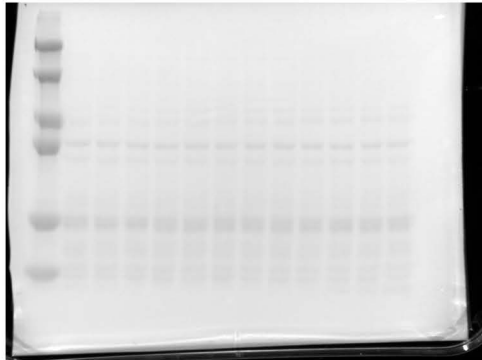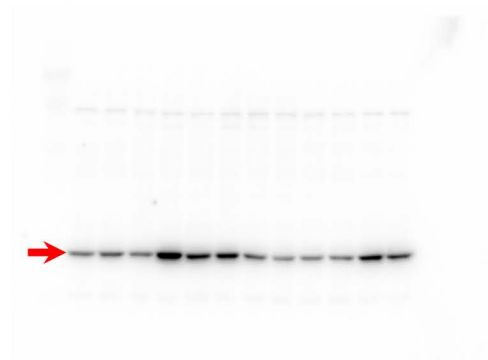

Mature root  
 $\alpha$ S6K1/2

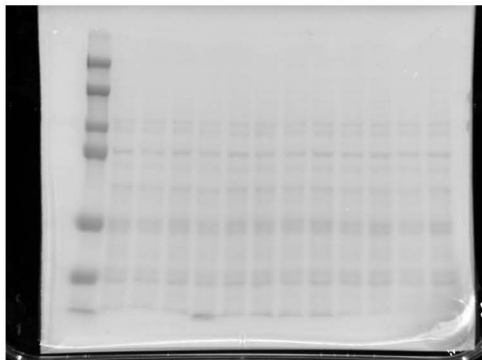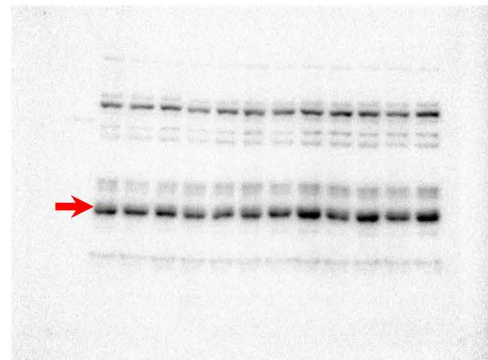

Mature root  
Phos-S6K

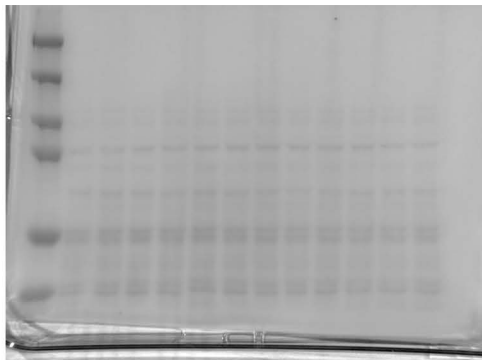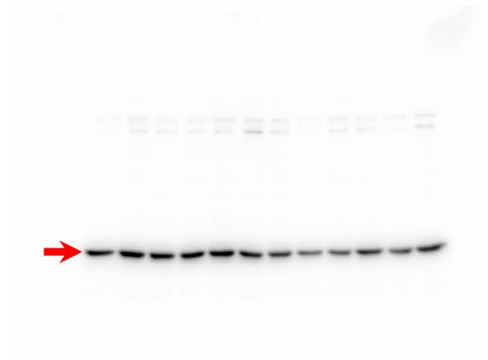

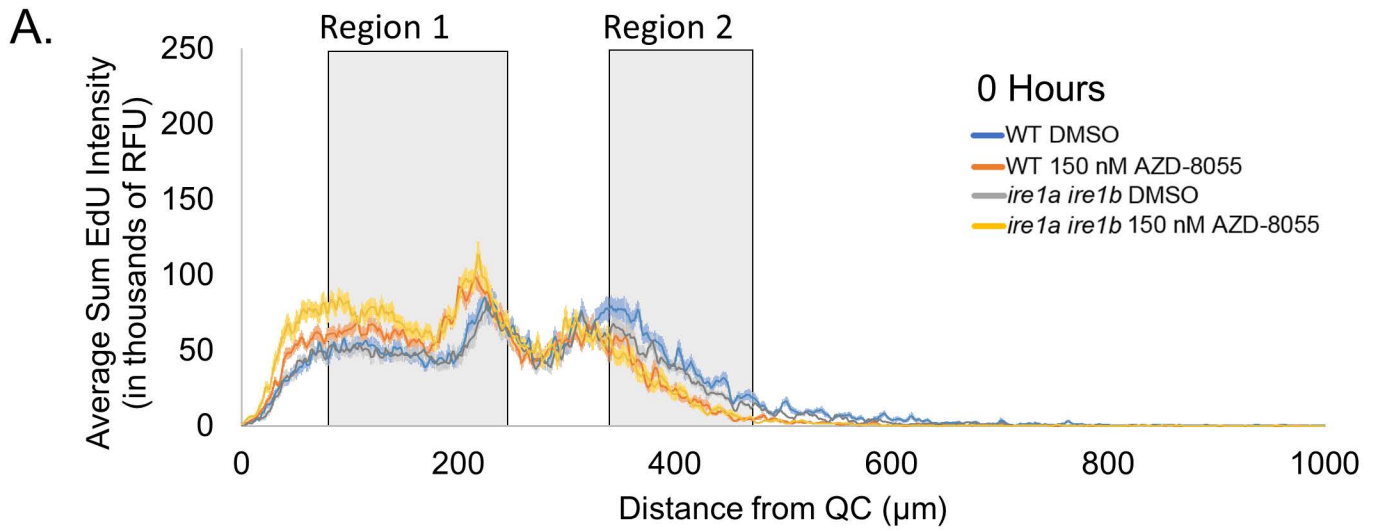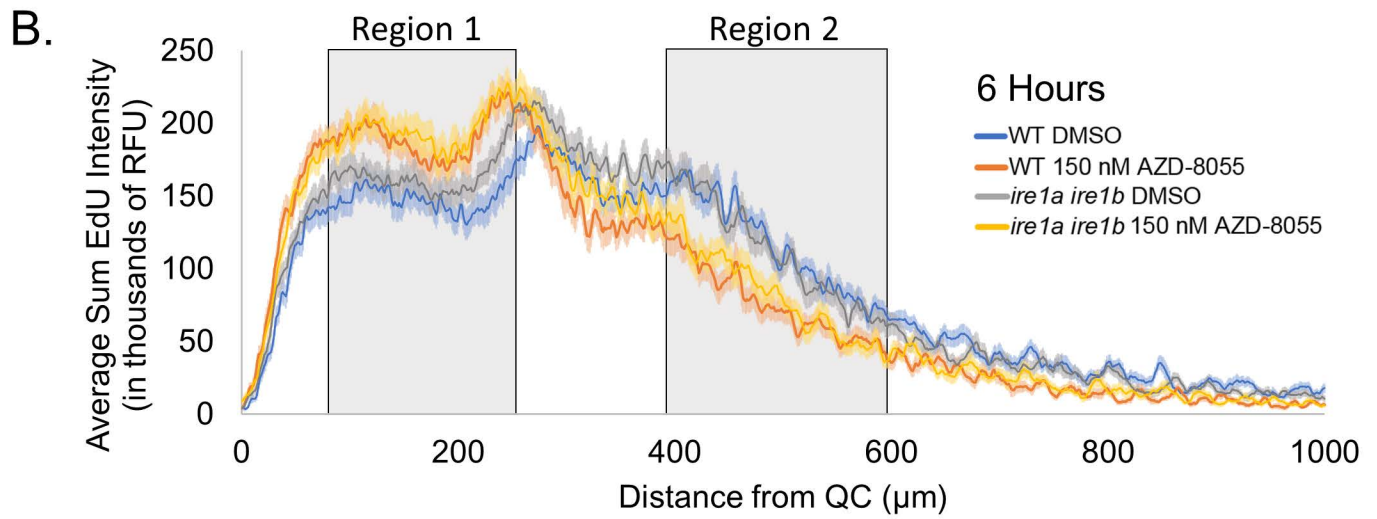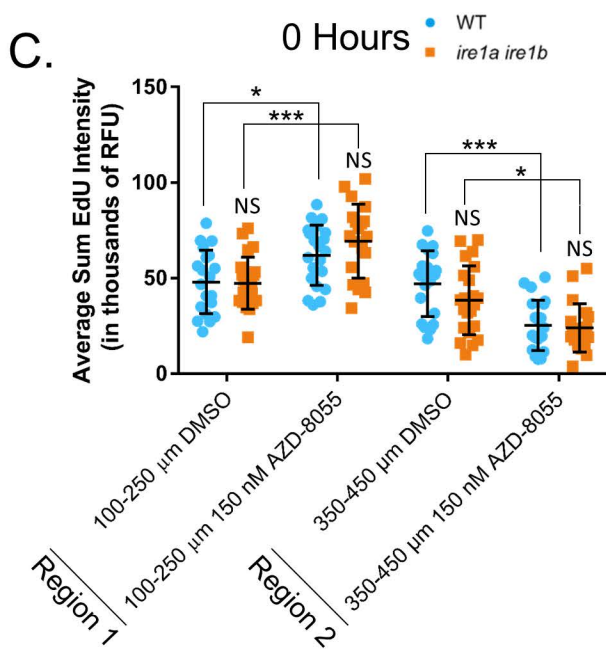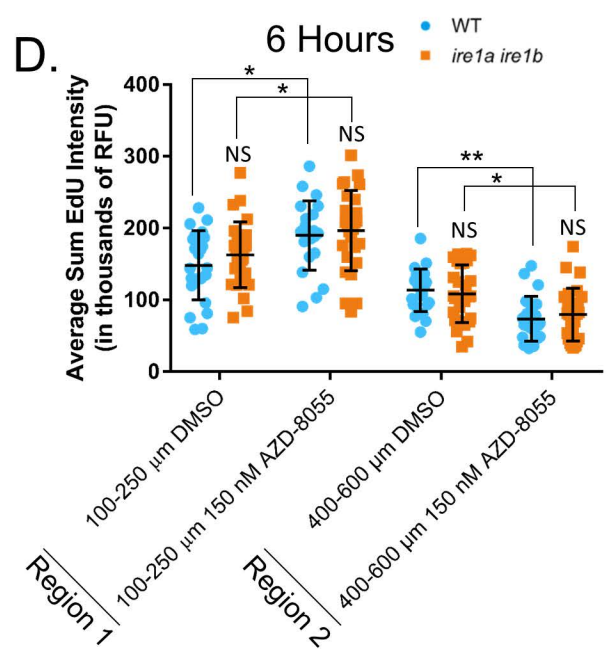

Rate of cell elongation prior to root hair initiation

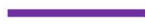

Rate of Differentiation

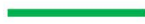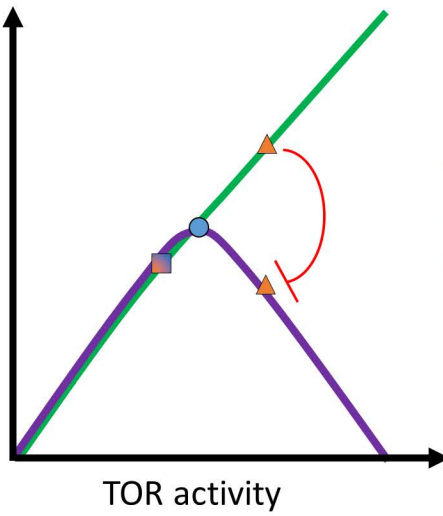

- WT- DMSO
- ▲ *ire1*- DMSO
- WT & *ire1* - AZD-8055



### Shoot Fresh Weight

Three way ANOVA with log transformation (total number of shoot groups measured\* = 96)

| Variable         | Sum Sq  | Df | F value  | Pr(>F)    |
|------------------|---------|----|----------|-----------|
| Genotype         | 0.0004  | 1  | 0.0578   | 0.810669  |
| AZD              | 0.0186  | 1  | 2.4961   | 0.117888  |
| Day              | 13.4755 | 2  | 904.5419 | < 2.2e-16 |
| Genotype:AZD     | 0.0058  | 1  | 0.7823   | 0.378956  |
| Genotype:Day     | 0.0028  | 2  | 0.1859   | 0.830704  |
| AZD:Day          | 0.0083  | 2  | 0.5549   | 0.576235  |
| Genotype:AZD:Day | 0.0022  | 2  | 0.15     | 0.860925  |
| Residuals        | 0.6257  | 84 |          |           |

\*8-10 shoots of a single genotype were weighed as a group. To calculate an individual measurement, the sum

### Root Length

Three way wANOVA (total number of roots measured = 899)

| Variable         | Sum Sq | Df  | F value  | Pr(>F)    |
|------------------|--------|-----|----------|-----------|
| Genotype         | 30.8   | 1   | 18.747   | 1.66E-05  |
| AZD              | 122    | 1   | 74.315   | < 2.2e-16 |
| Day              | 6527.7 | 2   | 1988.251 | < 2.2e-16 |
| Genotype:AZD     | 23.4   | 1   | 14.229   | 0.000173  |
| Genotype:Day     | 488    | 2   | 148.646  | < 2.2e-16 |
| AZD:Day          | 65.2   | 2   | 19.863   | 3.64E-09  |
| Genotype:AZD:Day | 220.8  | 2   | 67.253   | < 2.2e-16 |
| Residuals        | 1456.1 | 887 |          |           |

### Root Tip Angle

Three way wANOVA (total number of roots measured = 843)

| Variable         | Sum Sq | Df  | F value | Pr(>F)  |
|------------------|--------|-----|---------|---------|
| Genotype         | 0.4    | 1   | 0.2271  | 0.63382 |
| AZD              | 0      | 1   | 0.0022  | 0.96238 |
| Day              | 15.2   | 2   | 4.1923  | 0.01543 |
| Genotype:AZD     | 0.6    | 1   | 0.3229  | 0.57002 |
| Genotype:Day     | 16.1   | 2   | 4.439   | 0.01209 |
| AZD:Day          | 3.6    | 2   | 0.9862  | 0.37344 |
| Genotype:AZD:Day | 6.8    | 2   | 1.8714  | 0.15456 |
| Residuals        | 1508   | 831 |         |         |

This experiment was performed 2 times with similar results. The results from 1 representative experiment are

weight was divided by the number of seedlings in that group.

```
suppressMessages(library(readxl))
suppressMessages(library(tidyverse))
suppressMessages(library(ggpubr))
suppressMessages(library(car))
suppressMessages(library(performance))
suppressMessages(library(lmtest))
suppressMessages(library(MASS))
suppressMessages(library(WRS2))
suppressMessages(library(rstatix))
suppressMessages(library(emmeans))
```

# Replace the XXXXXX with your file path and make sure the variables label (i.e. gen azd and day) in the parenthesis matches the variables at the top of your columns in the spreadsheet

```
data2 <- read_excel("E:/XXXXXX.xlsx", sheet = "Sheet1")
data2$v1=as.factor(data2$gen)
data2$v2=as.factor(data2$azd)
data2$v3=as.factor(data2$day)
data2$v1=relevel(as.factor(data2$gen), ref='wt')
data2$v2=relevel(as.factor(data2$azd), ref='dms0')
data2$v3=relevel(as.factor(data2$day), ref='7')
```

# Check if data and its variables are correct

```
str(data2)
print(head(data2))
```

# Interaction means plot

```
ggboxplot(data2, x = "v2", y = "datax", color = "v1", facet.by = "v3",
  add = c("mean_se"),
  ylab = "Dependent Variable", xlab = "Experimental",
  palette = c("#000099", "#CC0000"))
```

####

```
data2$logdatax = log(data2$datax)
```

# Interaction means plot

```
ggboxplot(data2, x = "v2", y = "logdatax", color = "v1", facet.by = "v3",
  add = c("mean_se"),
  ylab = "Dependent Variable", xlab = "Treatment",
  palette = c("#000099", "#CC0000"))
```

# ANOVA analysis

# 3-way ANOVA using the untransformed data

```
M11 <- aov(datax ~ v1*v2*v3,data2)
summary(M11)
Anova(M11, type = "III")
```

# The residuals versus fitted plot, QQ residual plot, assumption checks for M11\_ pass or fail?

```
plot(M11,which=1:3)
x
x
x
leveneTest(datax ~ v1*v2*v3,data2)
```



```

bptest(M11)
shapiro.test(x = residuals(M11))

# 3-way ANOVA using the log transformed data
M12 <- aov(logdatax ~ v1*v2*v3,data2)
summary(M12)
Anova(M12, type = "III")

# The residuals versus fitted plot, QQ residual plot, assumption checks for M12_ pass or fail?
plot(M12,which=1:3)
x
x
x
leveneTest(logdatax ~ v1*v2*v3,data2)
bptest(M12)
shapiro.test(x = residuals(M12))

# box cox transformation use the graph to determine the box cox transformation value
boxcox(M11)

# 3-way ANOVA using the boxcox transformed data
M13 <- aov(((( datax ^ 0.2) - 1) / 0.2) ~ v1*v2*v3,data2)
summary(M13)
Anova(M13, type = "III")

# The residuals versus fitted plot, QQ residual plot, assumption checks for M13_ pass or fail?
plot(M13,which=1:3)
x
x
x
leveneTest(logdatax ~ v1*v2*v3,data2)
bptest(M13)
shapiro.test(x = residuals(M13))

# Weighted Least Squares
data2$logdatax = log(data2$datax)
attach(data2)
plot(x=data2$v1:data2$v3,y=data2$datax)
model.1 <- lm(datax ~ v1*v2*v3,data=data2)
summary(model.1)
Anova(model.1,type = "III")
plot(fitted(model.1), residuals(model.1), col= v1)
plot(v3, residuals(model.1))
plot(v3, abs(residuals(model.1)))
wts <- 1/fitted(lm(abs(residuals(model.1)) ~ v1:v2:v3))^2
model.2 <- lm(datax ~ v1*v2*v3,data=data2,weights = wts)
summary(model.2)
plot(fitted(model.2), rstandard(model.2), col=v3)
Anova(model.2,type = "III")

#pairwise comparison for a statistically significant interaction between variables
pwc1<-data2 %>%
  group_by(v2, v3) %>%

```

```
  emmeans_test(datax ~ v1, p.adjust.method = "bonferroni", model = model.2)
pwc1

pwc2<-data2 %>%
  group_by(v1, v3) %>%
  emmeans_test(datax ~ v2, p.adjust.method = "bonferroni", model = model.2)
pwc2

detach(data2)
```
